# Supplementary material for: Tough polymeric hydrogels using ion-pair comonomers
Source: Royal Society of Chemistry journal article supplement (doi:10.1039/c9sm02493j), 2020-01-01
Supplement: c9sm02493j2.pdf [file c9sm02493j2.pdf]

Electronic Supplementary Material (ESI) for Soft Matter

## Tough Polymeric Hydrogels using Ion-Pair Comonomers

Ravindra N. Wickramasinhage<sup>a</sup>, Shailesh K. Goswami<sup>a</sup>, Christopher J. McAdam<sup>a</sup>, Lyall R. Hanton<sup>a</sup>, Stephen C. Moratti<sup>\*a</sup>

<sup>a</sup> Department of Chemistry University of Otago, PO Box 56, Dunedin, 9054, New Zealand.

<sup>\*a</sup> E-Mail: smoratti@chemistry.otago.ac.nz

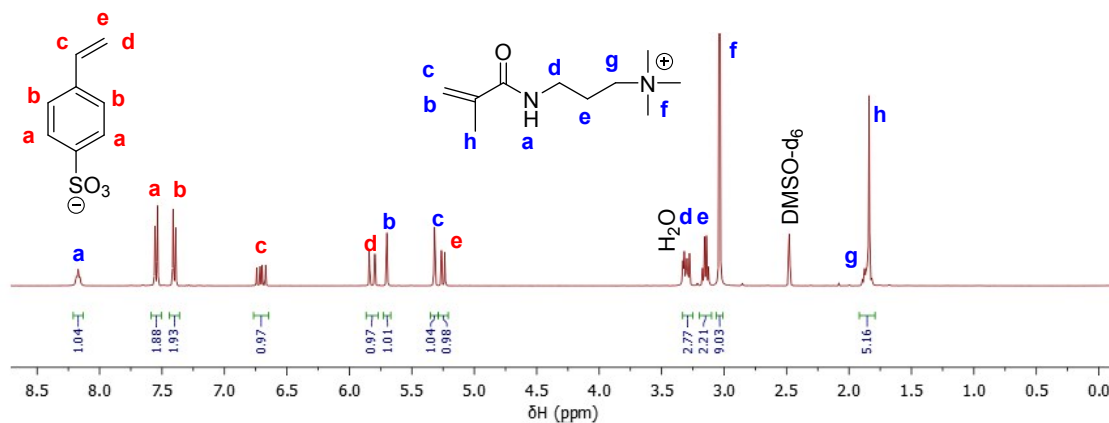

Fig. S1 <sup>1</sup>H NMR of the IPC salt 1

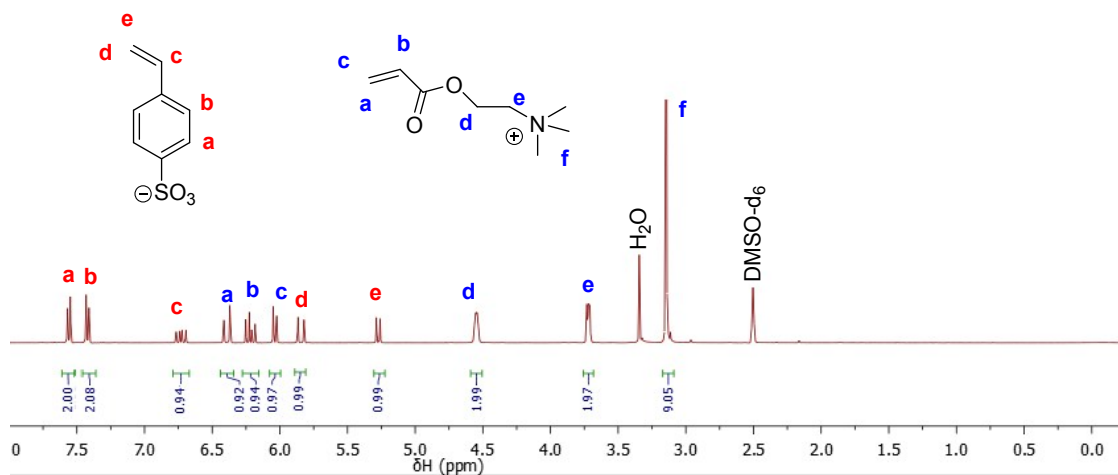

Fig. S2 <sup>1</sup>H NMR of the IPC salt 2

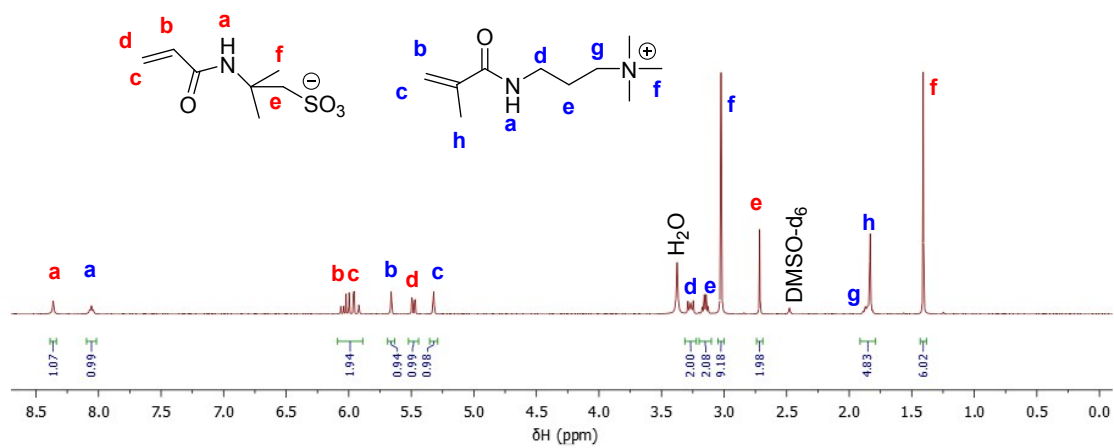

**Fig. S3** <sup>1</sup>H NMR of the IPC salt 3

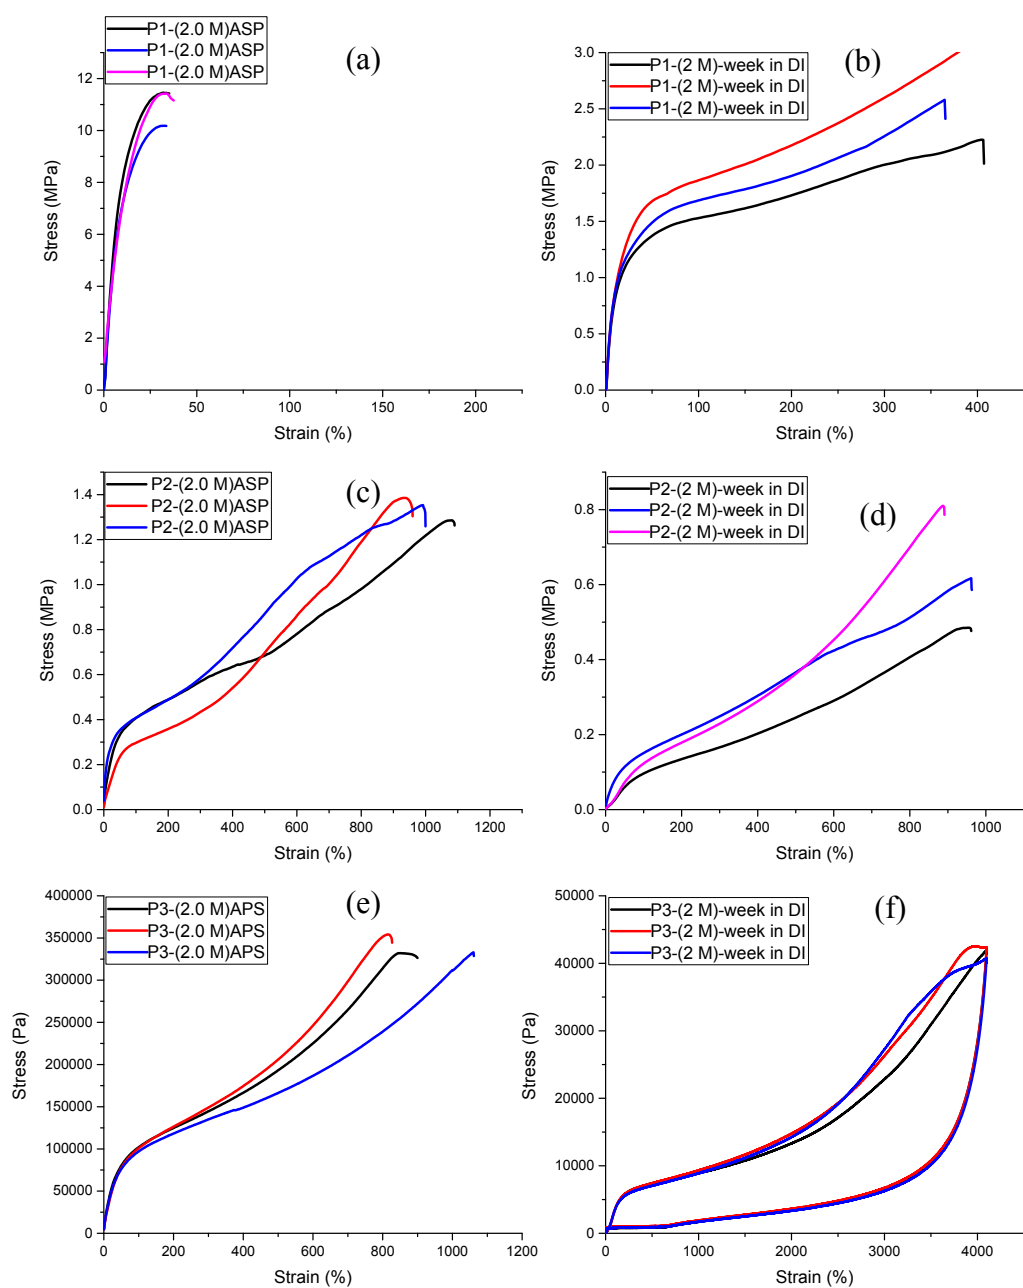

**Fig. S4** Three replicates of tensile tests, (a), (c) and (e) illustrate the 3 replicates of ASP gels of **P1**, **P2** and **P3** and (b), (d) and (f) are illustrate the same gel after equilibrate for week in DI water.

## Electronic Supplementary Material (ESI) for Soft Matter

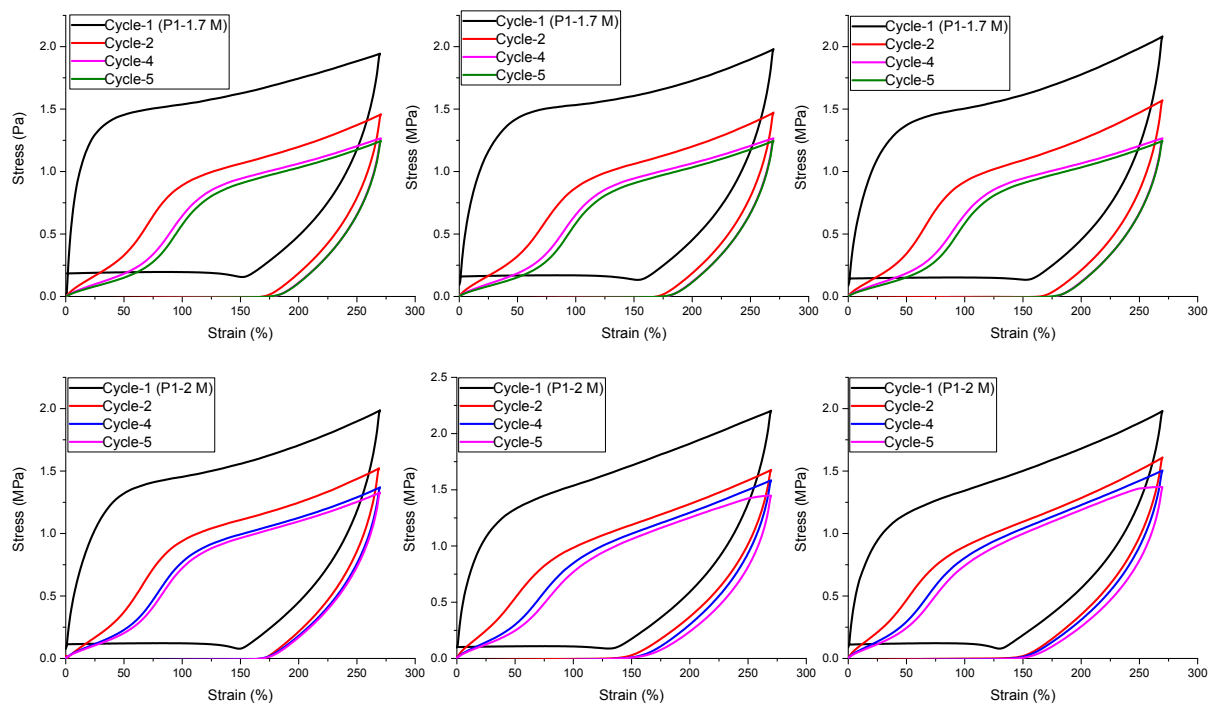

**Fig. S5** Three replicates of cycling tests, gel **P1(1.7 M)** cycling at 27 mm (top), gel **P1(2 M)** cycling at 27 mm (bottom) for 5 cycles with 10 minute recovery time between cycles.

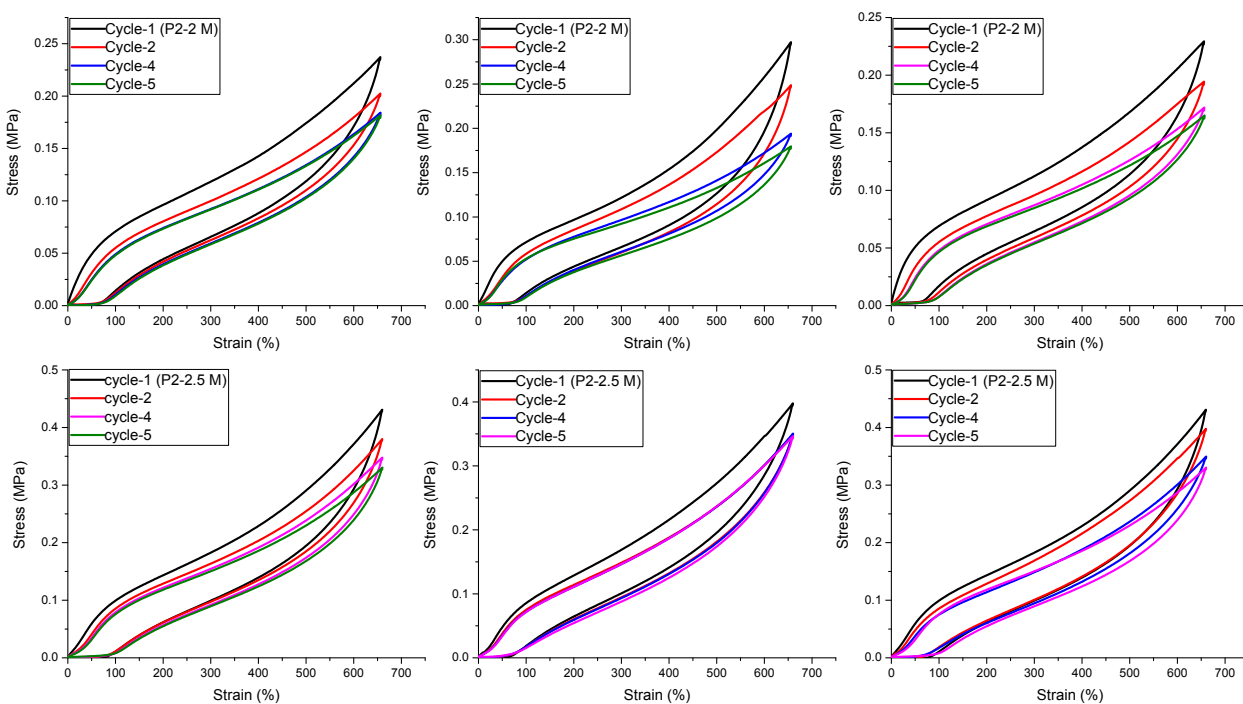

**Fig. S6** Three replicates of cycling tests, gel **P2(2 M)** cycling at 66 mm (top), gel **P2(2.5 M)** cycling at 66 mm (bottom) for 5 cycles with 10 minute recovery time between cycles.

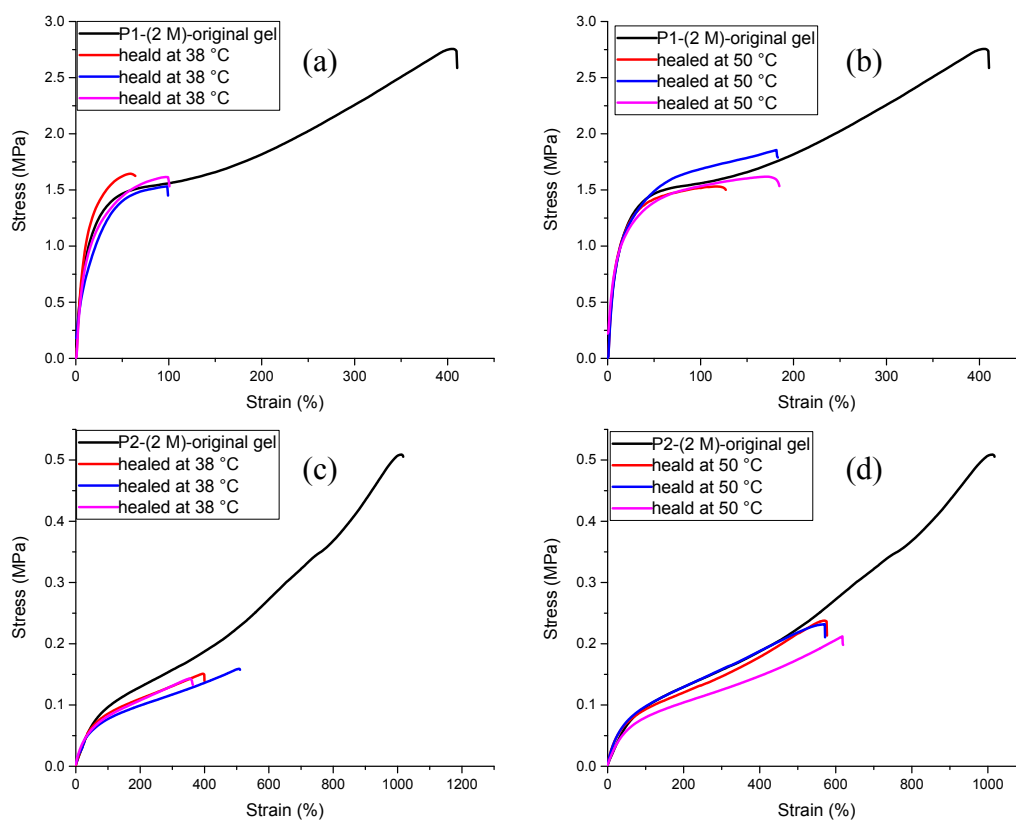

**Fig. S7** Three replicates of healing tests at elevated temperatures in DI water. (a), (b) healing behaviour of gel **P1(2 M)** at 38 °C and 50 °C, (c), (d) healing of gel sample **P2(2 M)** at same temperature respectively.

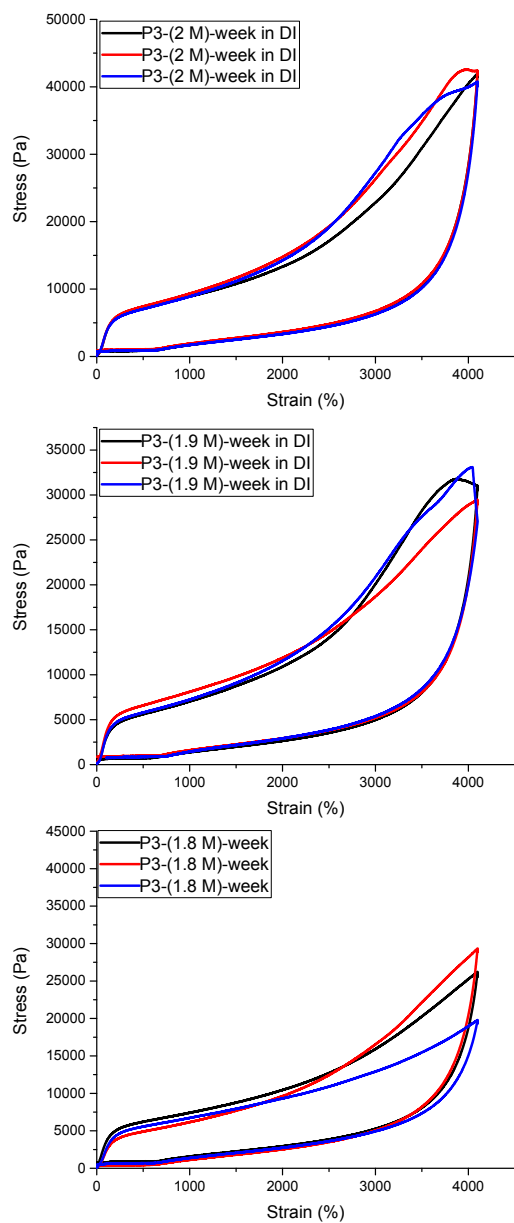

**Fig. S8** Three replicates of tensile tests of gel **P3** at different monomer concentrations.

Observed mechanical properties in the three types of polyampholyte gels are summarized in the table 2 and 3.

Table. S1 The summary of mechanical properties of polyampholyte hydrogels type of **P1** and **P2**.\*

| Gel type | C (M) | $\sigma b$ (MPa) | $\epsilon b$ (mm/mm) | E (MPa)        | A1 <sup>st</sup> /A5 <sup>th</sup> (%) |
|----------|-------|------------------|----------------------|----------------|----------------------------------------|
| P1-APS   | 2.0   | 11.02 ± 0.72     | 3.3 ± 0.06           | 9.63 ± 1.48    | -                                      |
| P1-wek   | 1.7   | 1.94 ± 0.23      | 35.30 ± 1.32         | 0.60 ± 0.025   | -                                      |
| P1-wek   | 2.0   | 2.53 ± 0.27      | 38.58 ± 2.0          | 1.04 ± 0.02    | 51.49 ± 2.72                           |
| P2-wek   | 2.0   | 1.34 ± 0.05      | 100.2 ± 7.3          | 0.054 ± 0.01   | -                                      |
| P2-wek   | 2.0   | 0.62 ± 0.15      | 93.41 ± 4.02         | 0.014 ± 0.005  | 75.11 ± 3.76                           |
| P2-wek   | 2.5   | 0.75 ± 0.085     | 82.24 ± 2.06         | 0.017 ± 0.0005 | 82.24 ± 1.24                           |

\* C,  $\sigma b$ ,  $\epsilon b$ , E, and A1<sup>st</sup>/A5<sup>th</sup>, represents the monomer concentration, fracture stress, fracture strain, Young's modulus and percentage recovery ratio calculated from hysteresis areas of the 1<sup>st</sup> cycle vs 5<sup>th</sup> cycle for the gel. The abbreviation (wek) mean gels are equilibrating in week time in DI water.

Table. S2 The summary of mechanical properties of polyampholyte hydrogels type of **P3**.\*

| Gel type | C (M) | $\sigma b$ (kPa) | $\epsilon b$ (mm/mm) | E (kPa) (maximum) | A1 <sup>st</sup> /A5 <sup>th</sup> (%)               |
|----------|-------|------------------|----------------------|-------------------|------------------------------------------------------|
| P3-wek   | 2.0   | 41.72 ± 0.83     | >400                 | 0.344 ± 0.011     | at 280 mm<br>39.5 ± 1.53<br>at 100 mm<br>64.1 ± 1.85 |
| P3-wek   | 1.9   | 29.19 ± 1.97     | >400                 | 0.298 ± 0.015     | -                                                    |
| P3-wek   | 1.8   | 23.19 ± 0.27     | >400                 | 0.271 ± 0.04      | -                                                    |

\* Abbreviations have same meaning as before.

### Supplementary Movie SM 1

(Video is playing at 4× faster than the actual strain rate)
